# Supplementary material for: Sleep Disturbances and Phenoconversion in Patients with REM Sleep Behavior Disorder
Source: MDPI journal article supplement (doi:10.3390/jcm10204709), 2021-10-14
Supplement: s1 [file s1]

**Table S1.** Correlation between RBD-related factors and sleep-related factors in patients with RBD (*n* = 226).

|                  | Age at RBD<br>Onset | RBD<br>Duration     | Frequency of<br>DEB | Presence of Neurological<br>Disorder | KVSS                |
|------------------|---------------------|---------------------|---------------------|--------------------------------------|---------------------|
| ESS              | -0.027              | 0.091               | -0.574              | 0.383                                | -0.160              |
| ISI              | 0.672               | -0.465              | -0.378              | -0.166                               | 0.041               |
| PSQI             | 0.810 * (0.015)     | -0.513              | -0.551              | -0.146                               | -0.463              |
| K-BDI-II         | -0.004              | -0.616              | -0.070              | -0.076                               | 0.311               |
| TST              | -0.136              | 0.583               | 0.055               | -0.138                               | -0.324              |
| SL               | 0.077               | -0.745 *<br>(0.034) | 0.103               | -0.333                               | 0.315               |
| REM latency      | -0.313              | 0.460               | -0.343              | 0.804 * (0.016)                      | -0.087              |
| WASO,<br>percent | 0.115               | -0.103              | -0.316              | 0.517                                | 0.021               |
| N1               | -0.192              | 0.477               | -0.185              | 0.420                                | 0.117               |
| N2               | 0.384               | -0.185              | -0.522              | 0.058                                | -0.780 *<br>(0.023) |
| N3               | 0.056               | -0.183              | 0.844 * (0.008)     | -0.614                               | 0.620               |
| REM              | -0.245              | -0.255              | 0.556               | -0.348                               | 0.587               |
| AI               | 0.004               | 0.485               | -0.307              | 0.202                                | -0.249              |
| REM AI           | -0.085              | 0.385               | -0.590              | 0.229                                | -0.702              |

ESS, Epworth sleepiness scale; ISI, insomnia severity index; PSQI, Pittsburgh sleep quality index; BDI-II, Beck depression inventory-II; BMI, body mass index; WASO, wake after sleep onset; REM, rapid eye movement; NREM, non-rapid eye movement; AHI, apnea-hypopnea index; RDI, respiratory disturbance index; PLMI, periodic limb movements of sleep index; MAI, movement arousal index; RSWA, REM sleep without atonia. \* *p*-value < 0.05.

**Table S2.** Initial and follow-up PSG data of 19 non-converters.

| Variables                                   | Initial PSG ( <i>n</i> = 19) | Follow-Up PSG ( <i>n</i> = 19) | <i>p</i> -Value |
|---------------------------------------------|------------------------------|--------------------------------|-----------------|
| Age at PSG, years                           | 62.1 ± 9.5                   | 64.8 ± 9.6                     | <0.001 *        |
| Self-reported sleep measures                |                              |                                |                 |
| ESS                                         | 6.13 ± 3.3                   | 5.07 ± 3.0                     | 0.061           |
| ISI                                         | 9.5 ± 6.4                    | 7.2 ± 6.2                      | 0.081           |
| PSQI                                        | 6.2 ± 4.7                    | 5.7 ± 3.0                      | 0.824           |
| K-BDI-II                                    | 11.7 ± 5.8                   | 9.8 ± 4.9                      | 0.420           |
| Anthropometric and<br>Polysomnographic data |                              |                                |                 |
| BMI, kg/m <sup>2</sup>                      | 24.8 ± 2.1                   | 24.8 ± 2.6                     | 0.711           |
| NC, cm                                      | 39.5 ± 5.3                   | 38.3 ± 2.6                     | 0.631           |
| Total sleep time, min                       | 369.3 ± 79.6                 | 342.6 ± 66.1                   | 0.355           |
| Sleep latency, min                          | 12.5 ± 13.4                  | 16.4 ± 18.6                    | 0.251           |
| REM latency, min                            | 81.1 ± 54.6                  | 109.3 ± 73.9                   | 0.184           |
| WASO, %                                     | 15.1 ± 15.0                  | 17.3 ± 12.6                    | 0.495           |
| Sleep efficiency, %                         | 81.6 ± 15.7                  | 79.3 ± 13.1                    | 0.469           |
| Sleep stages                                |                              |                                |                 |
| N1 sleep, %                                 | 19.3 ± 12.4                  | 22.7 ± 15.0                    | 0.295           |
| N2 sleep, %                                 | 59.5 ± 10.2                  | 56.6 ± 12.4                    | 0.421           |
| N3 sleep, %                                 | 1.3 ± 3.0                    | 3.8 ± 6.1                      | 0.069           |
| REM sleep, %                                | 20.0 ± 9.2                   | 17.3 ± 5.2                     | 0.408           |
| Arousal Index, /h                           | 19.7 ± 12.4                  | 19.2 ± 8.6                     | 0.717           |
| REM arousal index, /h                       | 16.8 ± 9.0                   | 19.0 ± 8.9                     | 0.293           |
| AHI, /h                                     | 13.2 ± 15.0                  | 12.7 ± 10.5                    | 0.514           |

|             |             |             |       |
|-------------|-------------|-------------|-------|
| REM AHI, /h | 13.7 ± 13.8 | 12.7 ± 10.5 | 0.820 |
| RDI, /h     | 15.4 ± 14.7 | 14.1 ± 10.7 | 0.936 |
| REM RDI, /h | 16.2 ± 13.5 | 13.9 ± 10.3 | 0.650 |
| PLMI        | 30.6 ± 18.7 | 36.3 ± 25.3 | 0.612 |
| MAI         | 0.8 ± 1.4   | 2.4 ± 4.6   | 0.058 |

ESS, Epworth sleepiness scale; ISI, insomnia severity index; PSQI, Pittsburgh sleep quality index; BDI-II, Beck depression inventory-II; BMI, body mass index; NC, neck circumference; WASO, wake after sleep onset; REM, rapid eye movement; NREM, non-rapid eye movement; AHI, apnea-hypopnea index; RDI, respiratory disturbance index; PLMI, periodic limb movements of sleep index; MAI, movement arousal index; RSWA, REM sleep without atonia. \*  $p$ -value < 0.05. Variables were analyzed by a Wilcoxon sign rank test.
